# Supplementary material
Source: HighWire-hosted journal article supplement (https://www.cmaj.ca/highwire/filestream/58318/field_highwire_adjunct_files/0/176_11_1613.pdf)
Supplement: 176_11_1613.pdf [file 176_11_1613.pdf]

**Table 1:** Characteristics of 37 241 elderly residents of British Columbia who began taking antipsychotic medications between Jan. 1, 1996, and Dec. 31, 2004

| Characteristic                           | Type of antipsychotic medication;<br>no. (%) of patients* |                        | Odds ratio | p value |
|------------------------------------------|-----------------------------------------------------------|------------------------|------------|---------|
|                                          | Conventional<br>n = 12 882                                | Atypical<br>n = 24 359 |            |         |
| Age, yr, mean (SD)                       | 79.9 (8.8)                                                | 80.3 (8.4)             | —          | < 0.001 |
| Sex, male                                | 5120 (39.7)                                               | 8565 (35.2)            | 1.2        | < 0.001 |
| <b>History</b>                           |                                                           |                        |            |         |
| Cardiac arrhythmia                       | 6 (0.0)                                                   | 22 (0.1)               | 0.5        | 0.14    |
| Cerebrovascular disease                  | 1391 (10.8)                                               | 2430 (10.0)            | 1.1        | 0.013   |
| Congestive heart failure                 | 1084 (8.4)                                                | 1455 (6.0)             | 1.5        | < 0.001 |
| Diabetes mellitus                        | 1939 (15.1)                                               | 3362 (13.8)            | 1.1        | 0.001   |
| Myocardial infarction                    | 354 (2.7)                                                 | 551 (2.3)              | 1.2        | 0.052   |
| Other ischemic heart disease             | 493 (3.8)                                                 | 665 (2.7)              | 1.4        | < 0.001 |
| Other cardiovascular disorder            | 2609 (20.3)                                               | 4075 (16.7)            | 1.3        | < 0.001 |
| Cancer                                   | 0                                                         | 0                      | —          | —       |
| HIV infection                            | 0                                                         | 4 (0.0)                | 0.0        | 0.15    |
| Dementia                                 | 1247 (9.7)                                                | 3087 (12.7)            | 0.7        | < 0.001 |
| Delirium                                 | 967 (7.5)                                                 | 2060 (8.5)             | 0.9        | < 0.002 |
| Mood disorder                            | 2013 (15.6)                                               | 6198 (25.4)            | 0.5        | < 0.001 |
| Psychotic disorder                       | 1446 (11.2)                                               | 4103 (16.8)            | 0.6        | < 0.001 |
| Other psychiatric disorder               | 403 (3.1)                                                 | 1110 (4.6)             | 0.7        | < 0.001 |
| <b>Use of other drugs</b>                |                                                           |                        |            |         |
| Antidepressant                           | 3645 (28.3)                                               | 10154 (41.7)           | 0.6        | < 0.001 |
| Other psychotropic medication            | 542 (4.2)                                                 | 920 (3.8)              | 1.1        | 0.040   |
| Prior anticholinergic drug use           | 1140 (8.9)                                                | 1709 (7.0)             | 1.3        | < 0.001 |
| Current anticholinergic drug use         | 1868 (14.5)                                               | 2591 (10.6)            | 1.4        | < 0.001 |
| Total no. of drugs used, mean (SD)       | 7.4 (5.1)                                                 | 7.3 (5.0)              | —          | 0.60    |
| Hospital admission in previous 180 d     | 1923 (14.9)                                               | 3204 (13.2)            | 1.2        | < 0.001 |
| Nursing home residence in previous 180 d | 3980 (30.9)                                               | 6471 (26.6)            | 1.2        | < 0.001 |

\*Unless stated otherwise.
